# Supplementary material for: Transitions to Postsecondary Education in Young Adults with Hemoglobinopathies: Perceptions of Patients and Staff
Source: PubMed Central journal article supplement — Pediatr Qual Saf. 2020 Sep 25;5(5):e349. doi: 10.1097/pq9.0000000000000349 (PMC8487776; doi:10.1097/pq9.0000000000000349), 2020-09-25
Supplement: pqs-5-e349-s001.pdf [file pqs-5-e349-s001.pdf]

**Supplementary Table 1.** Representative Quotes from Patients and Accessibility Office Staff

| <b>Theme</b>                               | <b>Patient Quotes</b>                                                                                                                                                                                                                                                                                                             | <b>Accessibility Staff Quotes</b>                                                                                                                                                                                                                               |
|--------------------------------------------|-----------------------------------------------------------------------------------------------------------------------------------------------------------------------------------------------------------------------------------------------------------------------------------------------------------------------------------|-----------------------------------------------------------------------------------------------------------------------------------------------------------------------------------------------------------------------------------------------------------------|
| Theme 1 - Knowledge of Available Resources | <p>“when I had my accessibility office interview, they gave me a lot of information and resources about accessibility services and managing health issues at [my school] and I felt like I had a lot more support after the interview than I did before” (P04).</p>                                                               | <p>“It is beneficial for students to know their rights about accommodations, the college has a duty to accommodate legally. They may think that they are going to be a burden on the system ...they are not a burden, we want them to be successful” (S05).</p> |
|                                            | <p>“ I was really happy with the support I was given - extra time for tests/exams, separate space to write in my own room, with exams I was able to type on the computer since I have difficulty writing for a long period of time, reschedule due dates, extra time to complete assignments, and reduced course load” (P08).</p> | <p>“Make sure [health care providers] help make patients aware of what support is reasonable to ask for” (S01).</p>                                                                                                                                             |
|                                            | <p>“Go in and look more into the accommodations center that you are thinking about going to, to have accommodations</p>                                                                                                                                                                                                           | <p>“...there is a bursary for students with disabilities – a grant of \$2000 for students with permanent disabilities and they think they might not qualify, it is important to let them know they are eligible for this” (S04).</p>                            |

that would help them in the future.” (P07).

Theme 2 – Register Early with Appropriate Documentation

“...it took a burden off my shoulders knowing that I am not alone and that I have a shoulder to lean on” (P10)

“If I ever needed anything done to help me succeed, it wasn’t a long process [since I registered with accessibility services right away]” (P02).

“...if [students] don’t come with the correct medical forms, then I cannot give them all of the necessary supports. I cannot do much without the medical support and documentation” (S03).

“[Students should] research the program that they want to go into, connect with accessible learning services well in advance, research accessible learning and how much they can accommodate a student in a particular program” (S04).

“When students come to us after [a health crisis] their stress is more heightened...I think that’s probably the most difficult trying to figure it out for the students after the fact, but we would still advocate for retroactive accommodations

|                         |                                                                                                                                                                                                                                                                                                                                                                                                                                                                                                                                                                                                                                                                        |                                                                                                                                                                                                                                                                                                                                                                                                                                                                                                                                                                                                              |
|-------------------------|------------------------------------------------------------------------------------------------------------------------------------------------------------------------------------------------------------------------------------------------------------------------------------------------------------------------------------------------------------------------------------------------------------------------------------------------------------------------------------------------------------------------------------------------------------------------------------------------------------------------------------------------------------------------|--------------------------------------------------------------------------------------------------------------------------------------------------------------------------------------------------------------------------------------------------------------------------------------------------------------------------------------------------------------------------------------------------------------------------------------------------------------------------------------------------------------------------------------------------------------------------------------------------------------|
|                         |                                                                                                                                                                                                                                                                                                                                                                                                                                                                                                                                                                                                                                                                        | after the fact if we need to” (S04).                                                                                                                                                                                                                                                                                                                                                                                                                                                                                                                                                                         |
| Theme 3 – Self-Advocacy | <p>“Self-advocacy – don’t be scared, if you feel like you need help, not to be afraid to ask for help for it” (P08).</p> <p>“Let [your professor] know, if you are ever in the hospital, try to do your school work in the hospital and email your teachers so that they know why you are missing class” (P03).</p> <p>“It’s good to let the professors know and email the [teaching assistant] just to let them know, bring awareness to your professors [if you are admitted to the hospital]” (P03).</p> <p>“I advocated for myself [in my first accessibility office appointment]” (P08).</p> <p>“Use your resources wisely, if you get them, use them” (P08).</p> | <p>“...it is important that [students] are strong self-advocates and that they know their condition really well” (S04).</p> <p>“Students should have the ability to describe the condition, more information and detail is always better.” (S08).</p> <p>“...describe a day in their life, and describe within the last year for example, what did your condition look like, what supports were helpful for you” (S09).</p> <p>“Health care providers should talk about advocacy with students and be sure to tell them they are not alone ... encourage them to utilize [services] when needed.” (S01).</p> |

“I try to vigorously use the resources that I have at hand [when I get sick] so I don’t have to end up dropping courses” (P10).

“There is a stigma about accommodations, many students try not to get them” (S12).

“...students might be not connecting with [accessibility services] because they want to be ‘normal’” (S10).

“Talking to professors about their health issue is almost a necessity, especially if your condition means you may have an issue with attendance” (S01).
